# Supplementary material for: Bioavailability of Lumefantrine Is Significantly Enhanced with a Novel Formulation Approach, an Outcome from a Randomized, Open-Label Pharmacokinetic Study in Healthy Volunteers
Source: PubMed Central journal article supplement (PMC5571342; doi:10.1128/aac.00868-17), 2017-08-24
Supplement: AAC.00868-17_zac009176461s1.pdf [file AAC.00868-17_zac009176461s1.pdf]

1 **Bioavailability of lumefantrine is significantly enhanced with a novel formulation**  
2 **approach: A randomized, open-label pharmacokinetic study in healthy volunteers**

3

4 Running title: Novel solid dispersion formulations of lumefantrine

5

6

7 Jay Prakash Jain<sup>1#\*</sup>, F. Joel Leong<sup>2#\*</sup>, Lan Chen<sup>3</sup>, Sampath Kalluri<sup>1</sup>, Vishal Koradia<sup>5</sup>,  
8 Daniel S. Stein<sup>4</sup>, Marie-Christine Wolf<sup>5</sup>, Gangadhar Sunkara<sup>4</sup>, Jagannath Kota<sup>1</sup>

9

- 10 1. Novartis Healthcare Pvt Ltd, Hyderabad, India;  
11 2. Novartis Institute for Tropical Diseases, Singapore;  
12 3. Novartis Institutes for BioMedical Research, Shanghai, PR China;  
13 4. Novartis Pharma, East Hanover NJ, USA;  
14 5. Novartis Pharma AG, Basel, Switzerland;

15

16 \*These authors contributed equally to this work

17 #Correspondence to: Joel Leong, [joel.leong@novartis.com](mailto:joel.leong@novartis.com) and Jay Prakash Jain,

18 [jay\\_prakash.jain@novartis.com](mailto:jay_prakash.jain@novartis.com)

19

20 **Supplementary data**

21 **Table S1** **Geometric mean ratio (test/reference) and 90 percent confidence**  
 22 **intervals for pharmacokinetic parameters assessing a 960 mg**  
 23 **versus 480 mg lumefantrine dose**

| Parameter         | Treatment | N* | Adjusted<br>Geo-mean | Comparison           | Estimates         |              |
|-------------------|-----------|----|----------------------|----------------------|-------------------|--------------|
|                   |           |    |                      |                      | Geo-mean<br>ratio | (90% CI)     |
| AUCinf (h×µg/mL)  | Cohort 2  | 4  | 128.05               |                      |                   |              |
|                   | Cohort 5  | 4  | 197.28               | Cohort 5 vs Cohort 2 | 1.54              | (1.15, 2.06) |
|                   | Cohort 3  | 4  | 96.25                |                      |                   |              |
|                   | Cohort 7  | 4  | 107.18               | Cohort 7 vs Cohort 3 | 1.11              | (0.41, 3.02) |
| AUClast (h×µg/mL) | Cohort 2  | 3  | 108.92               |                      |                   |              |
|                   | Cohort 5  | 3  | 165.96               | Cohort 5 vs Cohort 2 | 1.52              | (0.96, 2.41) |
|                   | Cohort 3  | 3  | 87.56                |                      |                   |              |
|                   | Cohort 7  | 3  | 111.21               | Cohort 7 vs Cohort 3 | 1.27              | (0.23, 6.97) |
| Cmax (ng/mL)      | Cohort 2  | 4  | 5250.56              |                      |                   |              |
|                   | Cohort 5  | 4  | 7619.35              | Cohort 5 vs Cohort 2 | 1.45              | (1.17, 1.79) |
|                   | Cohort 3  | 3  | 5550.34              |                      |                   |              |
|                   | Cohort 7  | 3  | 7025.31              | Cohort 7 vs Cohort 3 | 1.27              | (0.42, 3.83) |

n\* = number of subjects with non-missing values

Treatment- Cohort 2: 480 mg SDF variant-1 capsules (Fasting); Cohort 3: 480 mg SDF variant-2 capsules (Fasting); Cohort 5: 960 mg SDF variant-1 capsules (Fasting); Cohort 7: 960 mg SDF variant-2 capsules (Fasting)

24

25 **Liquid chromatography-Mass spectrometry (LC-MS/MS) method**

26 Lumefantrine concentration was determined by a validated Liquid chromatography-Mass  
 27 spectrometry (LC-MS/MS) method with a Lower Limit of Quantification (LLOQ) of 50  
 28 ng/mL. Briefly, the bioanalytical method consisted of protein precipitation followed by  
 29 solid phase extraction of human plasma samples and analysis of diluted samples by LC-  
 30 MS/MS in Multiple Reaction Monitoring (MRM) positive mode using Electrospray  
 31 Ionization (ESI) as the ionization technique. The lower and upper limits of quantification  
 32 for linear range were 50.0 ng/mL and 20000 ng/mL respectively using 10 µL of human  
 33 plasma. Lumefantrine in human plasma is stable for 44 hours at room temperature; 9  
 34 months at  $\leq -70^{\circ}\text{C}$ ; 3 freeze/thaw cycles at  $\leq -70^{\circ}\text{C}$ ; the extract is stable for 100 hours in  
 35 an autosampler at  $8^{\circ}\text{C}$ . The stability data could cover the period from sampling to  
 36 analysis of all study samples. For eight points calibration concentration (50, 100, 200,  
 37 500, 2000, 5000, 16000 and 20000 ng/mL) bias was within the range of  $\pm 15.0\%$  at all

38 concentrations except for LLOQ (50 ng/mL) for which it was within the range of  $\pm 20.0\%$ .  
39 For quality control samples (150 ng/mL, 2500 ng/mL and 15000 ng/mL) bias was within  
40 the range of  $\pm 15.0\%$  for at least 2/3 of the individual values.

41
